# Supplementary material for: Comparing contemporary revision burden among hip and knee joint replacement registries
Source: PubMed Central journal article supplement — Arthroplast Today. 2016 May 27;2(2):83–6. doi: 10.1016/j.artd.2016.04.003 (PMC4957265; doi:10.1016/j.artd.2016.04.003), 2016-05-27
Supplement: mmc3.pdf [file mmc3.pdf]

# CONFLICT OF INTEREST STATEMENT

## *Arthroplasty Today*

(Adopted from the American Academy of Orthopaedic Surgeons disclosure statement)

The following form **must be filled out completely and submitted by each author (example, 6 authors, 6 forms). If no discloser is required, please write/type "none" at the end of each sentence.**

Manuscript Title: Comparing contemporary revision burden among hip and knee replacement registries

1. Royalties from a company or supplier (The following conflicts were disclosed)  
*NONE*
2. Speakers bureau/paid presentations for a company or supplier (The following conflicts were disclosed)  
*SMITH & NEPHEW, INC. CONSULTANT.*
- 3A. Paid employee for a company or supplier (The following conflicts were disclosed)  
*NONE*
- 3B. Paid consultant for a company or supplier (The following conflicts were disclosed)  
*NONE*
- 3C. Unpaid consultants for a company or supplier (The following conflicts were disclosed)  
*NONE*
4. Stock or stock options in a company or supplier (The following conflicts were disclosed)  
*NONE*
5. Research support from a company or supplier as a Principal Investigator (The following conflicts were disclosed)  
*NONE*
6. Other financial or material support from a company or supplier (The following conflicts were disclosed)  
*NONE*
7. Royalties, financial or material support from publishers (The following conflicts were disclosed)  
*NONE*
8. Medical/Orthopaedic publications editorial/governing board (The following conflicts were disclosed)  
*ARTHROPLASTY TODAY*
9. Board member/committee appointments for a society (The following conflicts were disclosed)  
*AAHKS.*

**Each author must sign AND print or type his/her name, date and submit a separate form**

In addition, one BLINDED Conflict of Interest form (no author names used) should be submitted per manuscript with all author disclosures.

*BJ McGRORY, MD.*



*4/18/16*

Author Name (Print or Type)

Author Signature

Date
